# Supplementary material
Source: Springer Nature journal article supplement (https://www.springermedizin.de/resource/supplementary/12889_2010_2259_MOESM1_ESM.pdf/9485178)
Supplement: MOESM1 [file 9485178]

Smokers screened (n= 86)

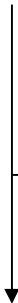

- Unstable medical condition (n=13)
- Recent oral hygiene treatment (n=10)
- Low motivation to stop smoking < 6/10 (n=6)
- Recent quit attempt or already abstinent (n=3)
- Regular cannabis or alcohol use (n=5)
- Not interested in the study after description (n=3)
- Schedule or location incompatibilities (n=4)
- Inclusion visit not attended (n=3)

Smokers included (n= 39)

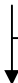

Abandonment after relapse (n=12)

Smokers who completed the 8-week intervention (n= 27)  
# of abstinent : 17

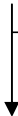

Relapse (n=11)

Abstinent smokers at 6 months, with expired CO test confirmation (n=6)
